# Supplementary material
Source: PubMed Central journal article supplement (PMC3186822)
Supplement: NIHMS308890-supplement-01.pdf [file NIHMS308890-supplement-01.pdf]

**Supplementary Table 1. Primer sequences used for real-time PCR.**

| <b>Gene</b> | <b>Sense</b>             | <b>Anti-sense</b>        |
|-------------|--------------------------|--------------------------|
| CEH         | ACGCTTGCCAGACCCTCTTC     | CTCAGCCACTTCAGCATCGC     |
| Cyp27a1     | TCATCGCACAAAGGAGAGCAATG  | CGTTTAAGGCATCCGTGTAGAGC  |
| Cyp7a1      | TTGTTCAAGACCGCACATAAAGCC | CGTAGACGGATCAGTTCAGAGACC |
| Cyp7b1      | TTTCAGTCCACTTCACCAGAGAAC | GCACAGCCTCAGAACCTCAAGA   |
| Cyp8b1      | CCCTGAGCCCACAGCCTTC      | GGATCTTCTTGCCCCACTTGTAG  |
| FXR         | TGCGATTACCACCACCACCTG    | CCGAACCTTAGCCAGCCACCA    |
| LRH-1       | GGCTCCGTTCCCTTCAGTTTCG   | TTCACCTGCTCTTGGACACCTTC  |
| Shp         | AAGGGCACGATCCTCTTCAACC   | CAGGGCTCCAAGACTTCACACA   |

Abbreviations: CEH, cholesteryl ester hydrolase; Cyp27a1, sterol 27-hydroxylase; Cyp7a1, 7- $\alpha$ -hydroxylase; Cyp7b1, oxysterol 7- $\alpha$ -hydroxylase; Cyp8b1, sterol 12- $\alpha$ -hydroxylase; FXR, farnesoid X receptor; LRH-1, liver-receptor homolog-1; Shp, small heterodimer partner

**Supplementary Table 2.** Antibody details and conditions used for western blotting (WB) and immunohistochemistry (IHC).

| Antibody          | Supplier         | Catalog # | Application | Dilution      |
|-------------------|------------------|-----------|-------------|---------------|
| $\alpha$ -ABCG5   | Santa Cruz       | sc-25796  | WB          | 1:500         |
| $\alpha$ -ABCG8   | Santa Cruz       | sc-30111  | WB          | 1:350         |
| $\alpha$ -ACAT2   | Cayman Chemicals | 100027    | WB          | 1:180         |
| $\alpha$ -Bsep    | Santa Cruz       | sc-74500  | WB          | 1:180         |
| $\alpha$ -Bsep    | Santa Cruz       | sc-25571  | IHC         | 1:200         |
| $\alpha$ -F4/80   | AbD Serotec      | MCA497R   | IHC         | 1:150         |
| $\alpha$ -FXR     | Abcam            | ab28480   | WB          | 1:500         |
| $\alpha$ -HSP90   | R&D systems      | AF3775    | WB          | 1:2000        |
| $\alpha$ -LDLR    | Abcam            | ab52818   | WB, IHC     | 1:1800, 1;200 |
| $\alpha$ -LRH-1   | Abcam            | ab41901   | WB          | 1:500         |
| $\alpha$ -Shp     | Santa Cruz       | sc-23057  | WB          | 1:200         |
| $\alpha$ -SR-B1   | Abcam            | ab52629   | WB, IHC     | 1:1800, 1:200 |
| $\alpha$ -SREBP-2 | Abcam            | ab28482   | WB          | 1:500         |

Abbreviations: ABC, ATP-binding cassette protein; ACAT, acyl-CoA:cholesterol acyltransferase; Bsep, bile salt exporter protein; FXR, farnesoid X receptor; LDLR, LDL-receptor; LRH-1, liver receptor homolog-1; Shp, small heterodimer partner; SR-B1, scavenger receptor B-1; SREBP-2, sterol response element binding protein-2. Antibodies were purchased from Abcam (Cambridge, UK), AbD Serotec (Oxford, UK), Cayman Chemicals (Ann Arbor, MI, USA), R&D Systems (Minneapolis, MN, USA), and Santa Cruz Biotechnology, Inc (Santa Cruz, CA. USA).

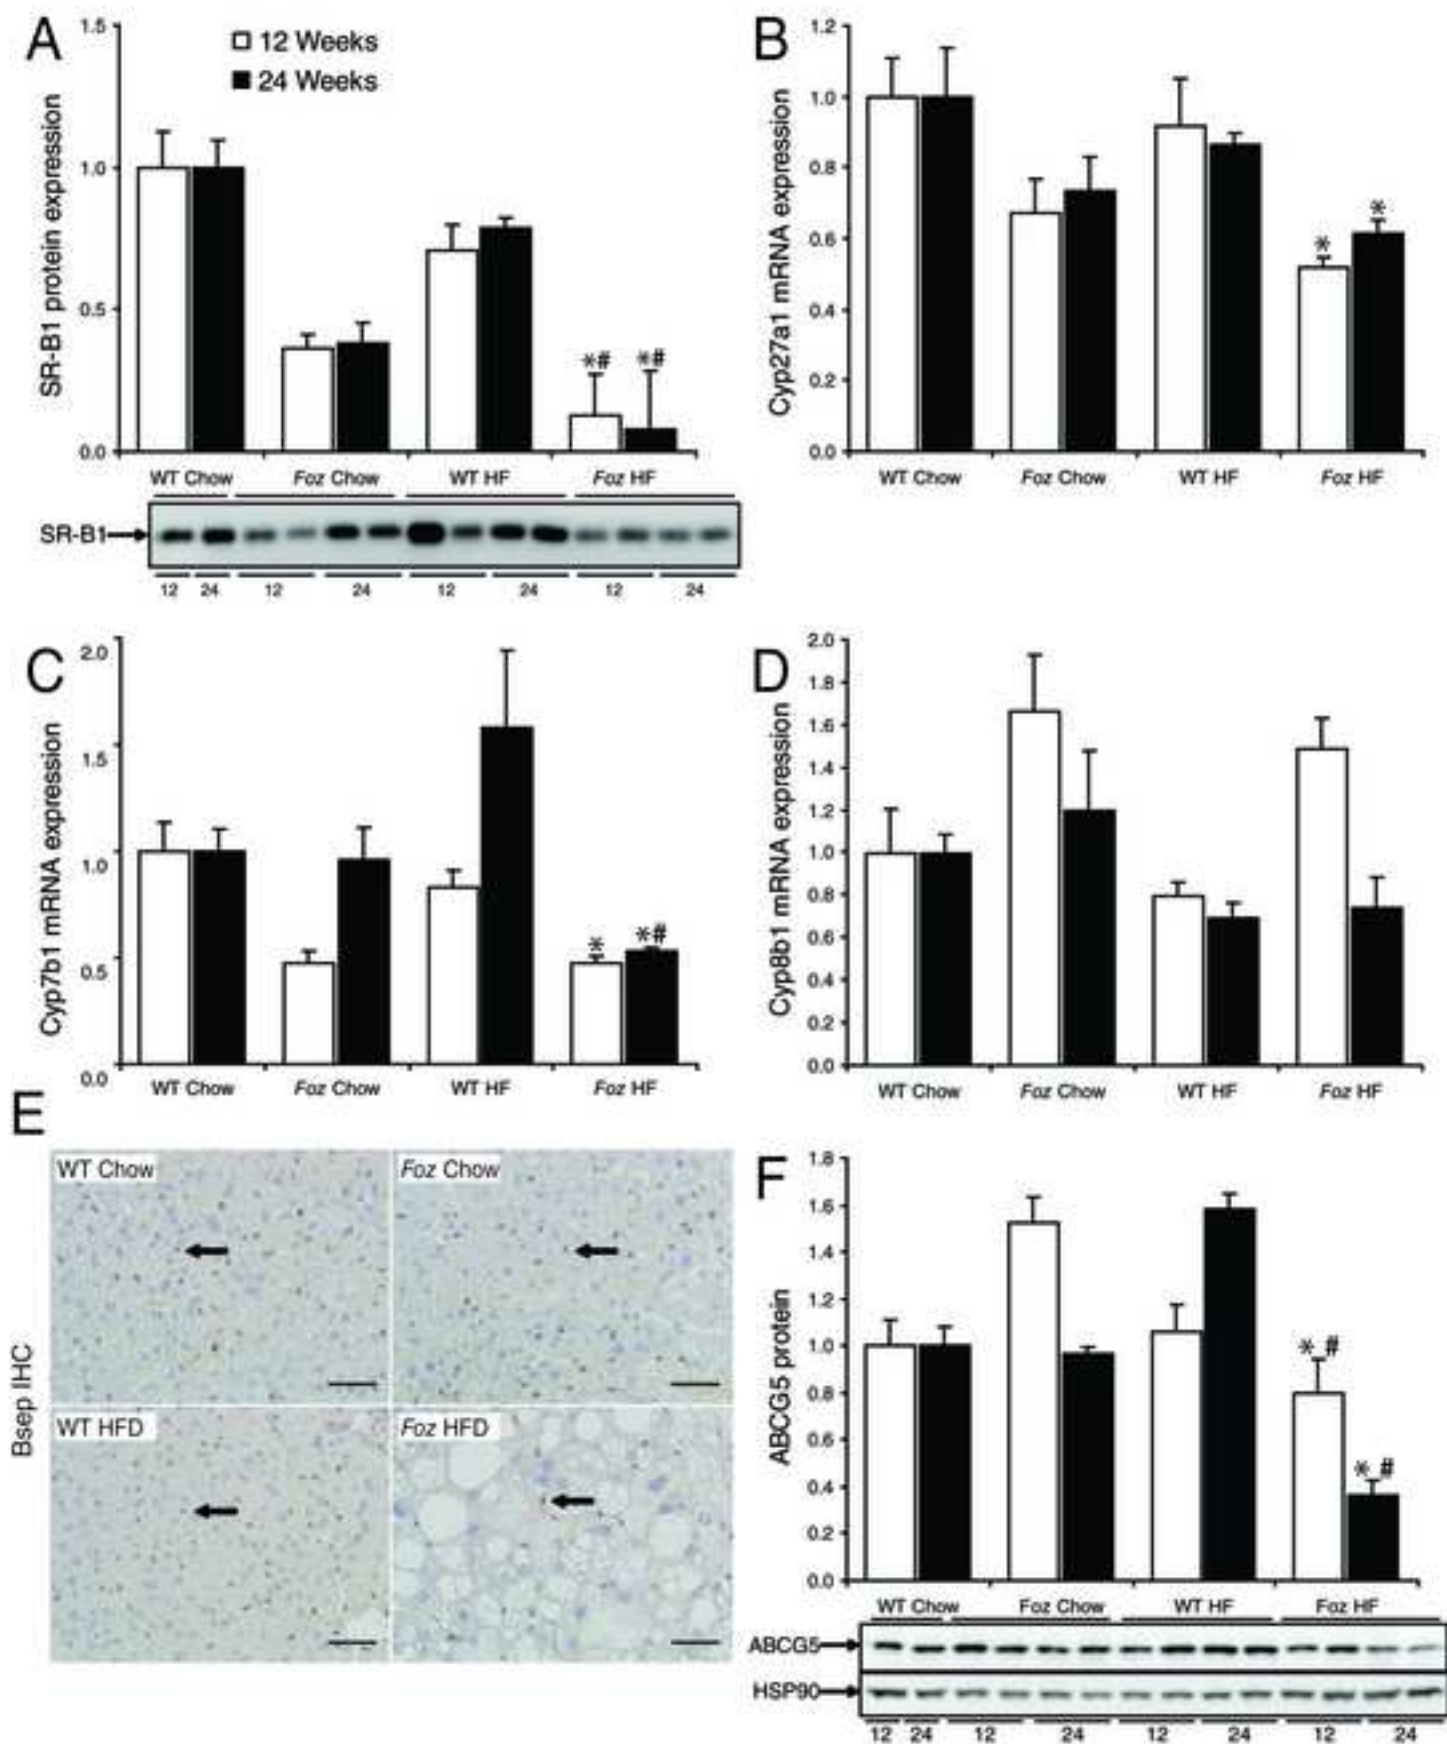

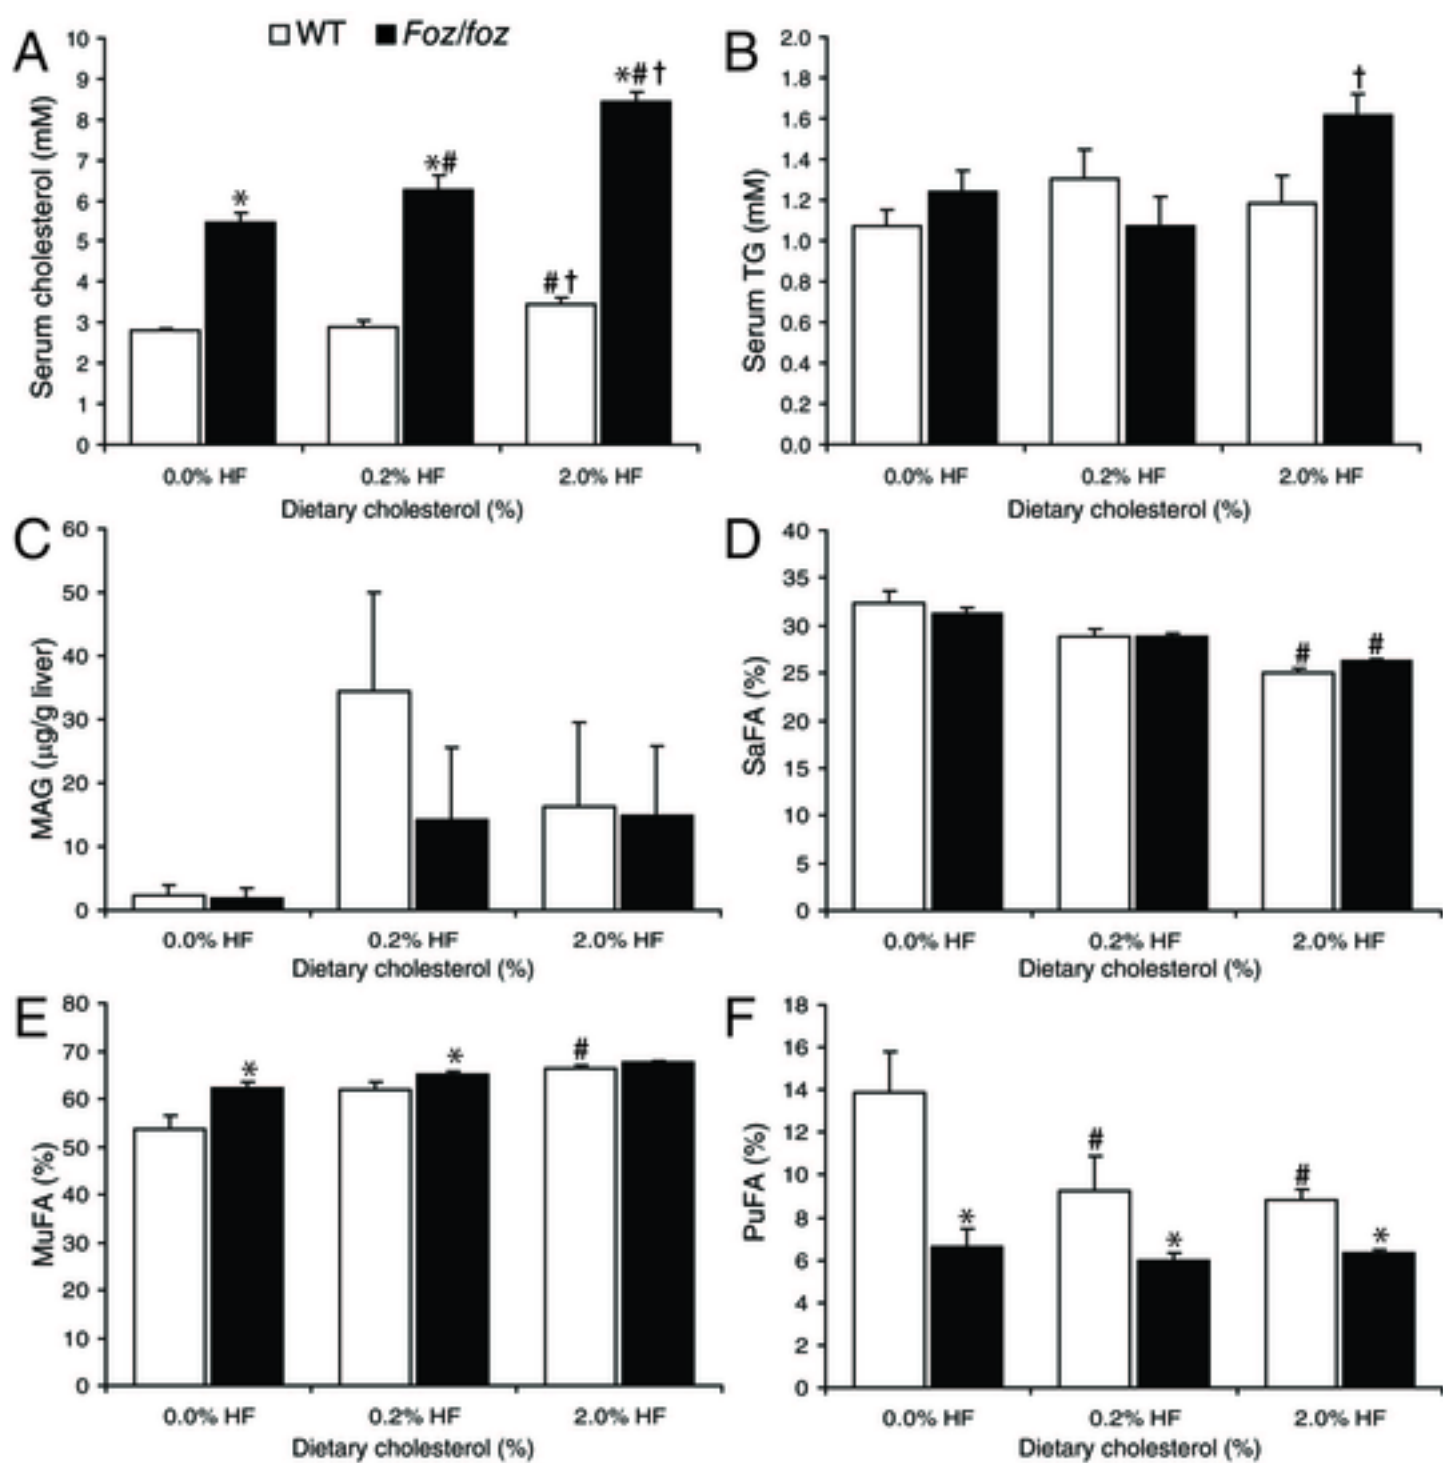

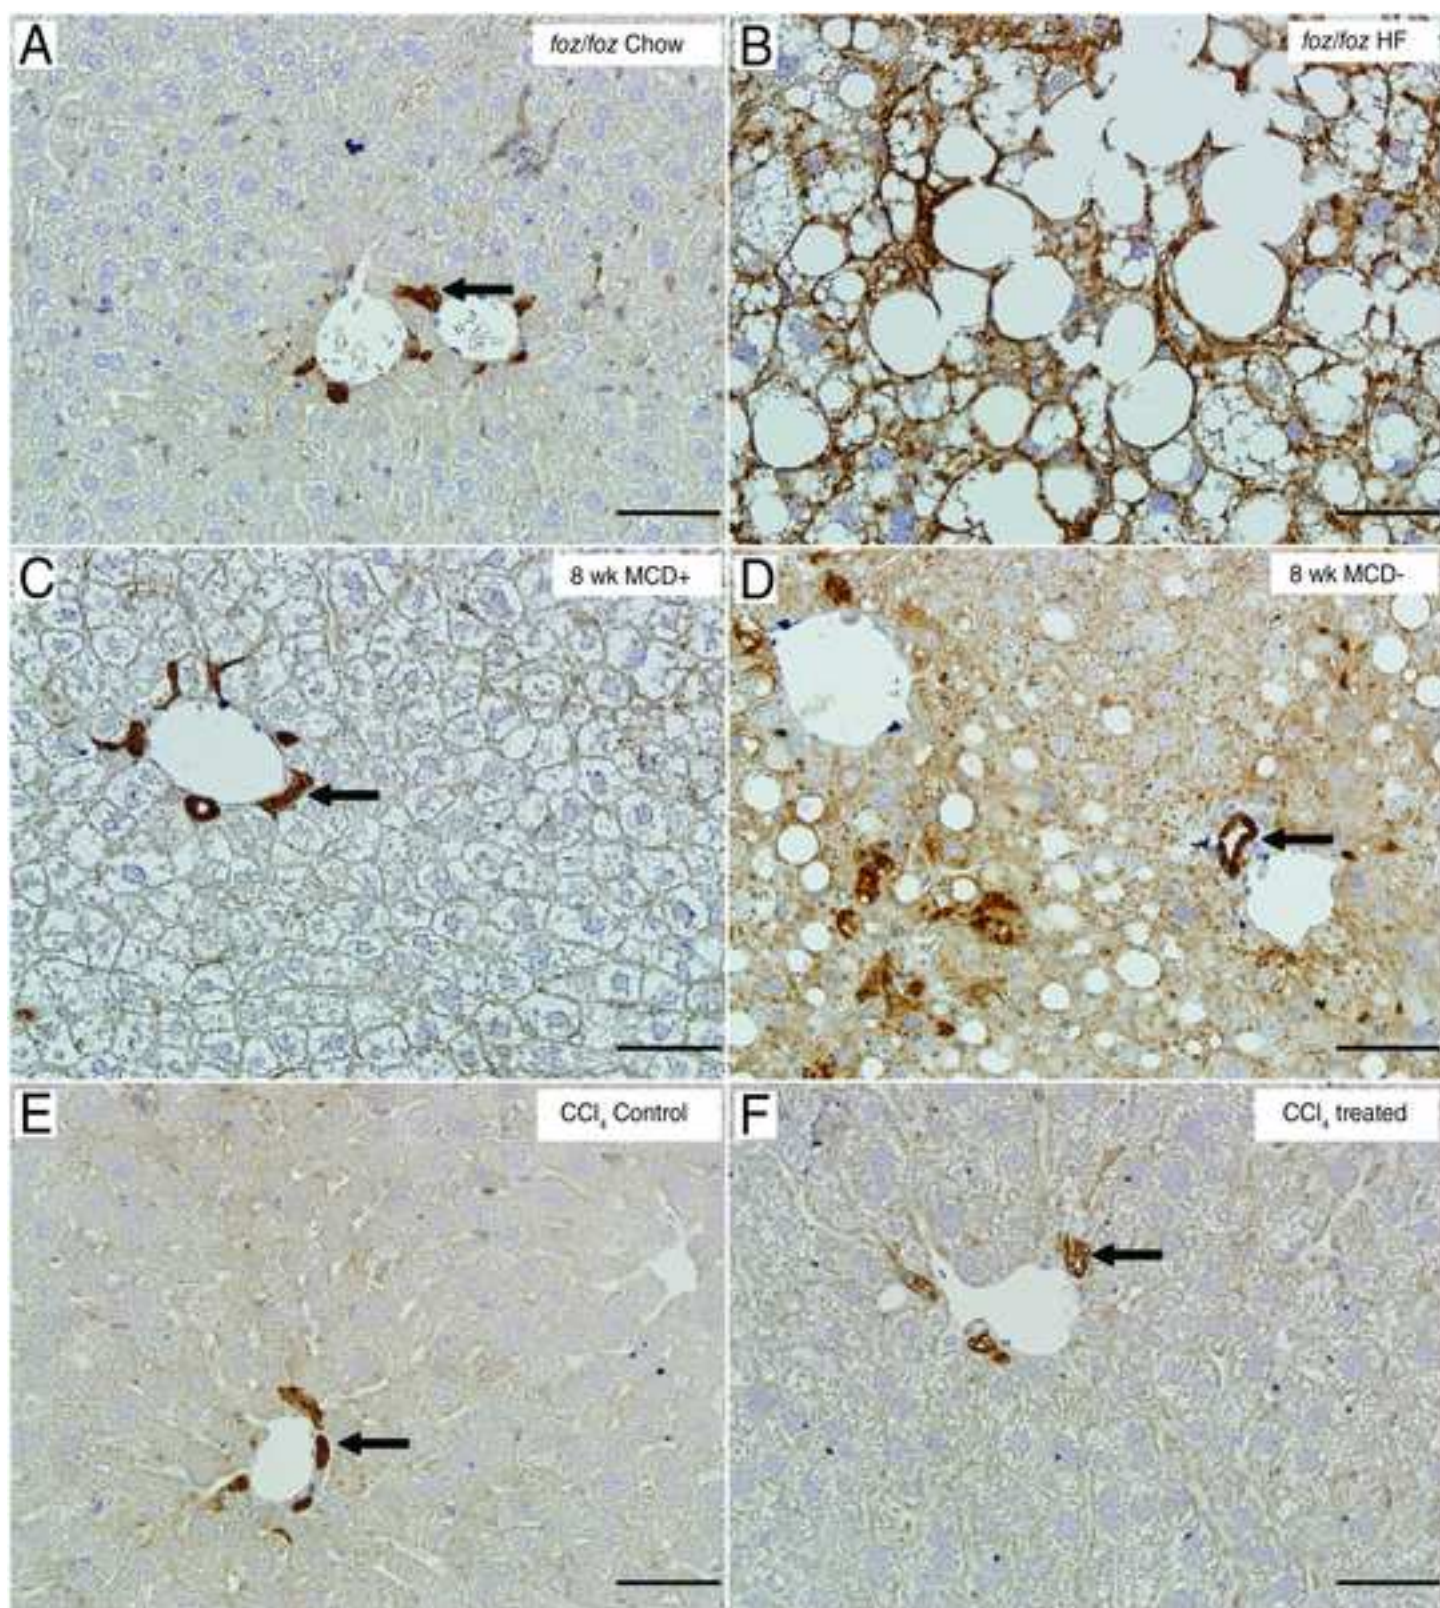

**Supplementary Figure 1. Differentially regulated pathways involved in cholesterol homeostasis.**

In addition to the pathways illustrated in Figure 2, we studied: (A) Scavenger receptor-B1 (SR-B1) protein expression, and (B) *Cyp27a1*, (C) *Cyp7b1*, (D) *Cyp8b1* mRNA expression at 12- (□) and 24- (■) weeks in WT and *foz/foz* mice (*n* values as per METHODS). (E) Bile salt exporter protein (Bsep) IHC staining in 24-week WT and *foz/foz* mouse livers produced similar results to WB analyses (Figure 2). (F) ATP-binding cassette-G5 (ABCG5) protein expression in mice at 12- and 24- weeks. Scale bars represent 50 μm. Arrows indicate positive staining. \**P*<0.05, vs. diet-matched control. #*P*<0.05, vs. genotype-matched, 0.2% cholesterol groups. †*P*<0.05, vs. genotype-matched, 2.0% cholesterol groups.

**Supplementary Figure 2. Dietary cholesterol increases serum cholesterol, but fails to alter other lipid profiles in HF-fed WT and *foz/foz* mice.**

(A) Total serum cholesterol and (B) triglyceride (TG) levels in WT (□) and *foz/foz* (■) mice (*n* values as per METHODS) fed HF-diet containing 0, 0.2 or 2.0% (w/w) cholesterol for 24-weeks. (C) Monoacylglycerides (MAG), (D) saturated FFAs (SaFA), (E) mono-unsaturated FFAs (MuFA), and (F) poly-unsaturated FFAs (PuFA) were determined by HPLC. \**P*<0.05, vs. diet-matched control. #*P*<0.05, vs. genotype-matched, 0.0% cholesterol groups. †*P*<0.05, vs. genotype-matched, 0.2% cholesterol groups.

**Supplementary Figure 3. Comparison between LDLR localization in *foz/foz*, methionine and choline-deficient (MCD) and carbon tetrachloride-treated mice .**

LDLR localization in (A) chow- and (B) HF-fed *foz/foz* mice at 24 weeks, (C) MCD control and (D) MCD-deficient mice at 8 weeks, and (E) carbon tetrachloride- (CCl<sub>4</sub>) control and (F) – treated mice at 4 weeks. Scale bars represent 20 μm.
